# Supplementary material for: High Concentrations of Measles Neutralizing Antibodies and High-Avidity Measles IgG Accurately Identify Measles Reinfection Cases
Source: PubMed Central journal article supplement (PMC4979181; doi:10.1128/cvi.00268-16), 2016-08-05

Classification By Measles  
Neutralizing Antibody Cutoff  
(40,000 mIU/mL)

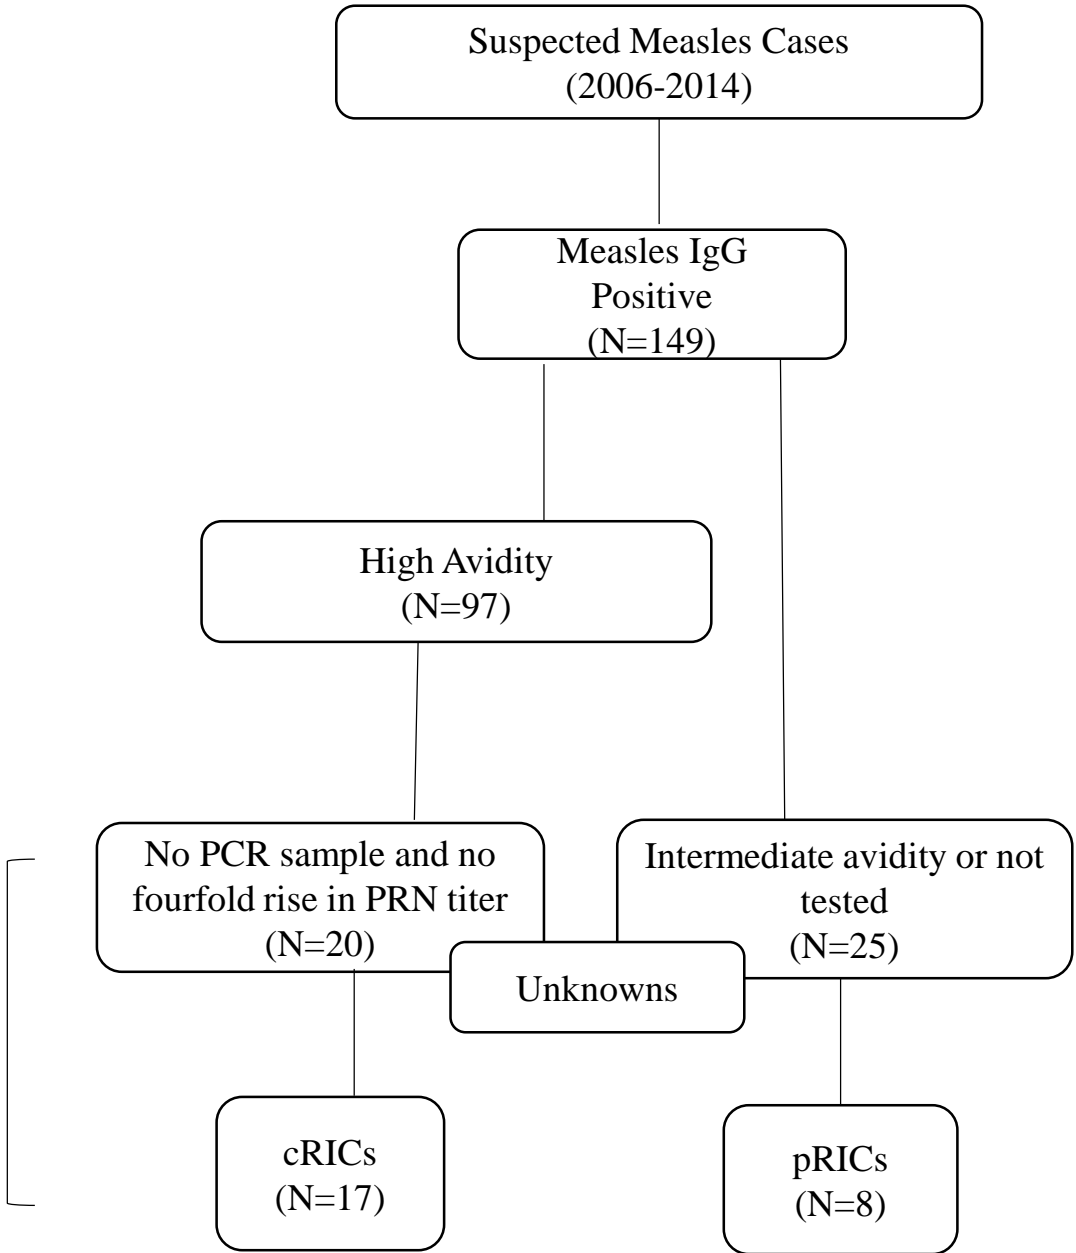

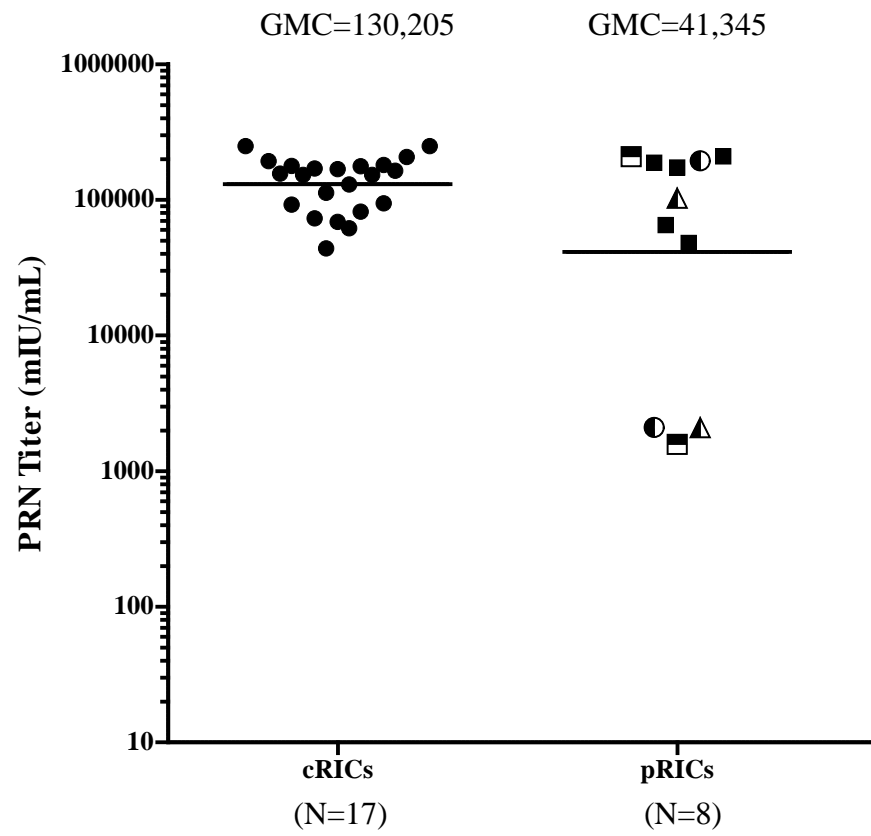

Supplement: CVI.00268-16_zcd999095389so2.pdf [file CVI.00268-16_zcd999095389so2.pdf]
